# Supplementary material
Source: PubMed Central journal article supplement (PMC4877320)
Supplement: jcsm.12.6.871s1.pdf [file jcsm.12.6.871s1.pdf]

**Table S1. ICD-10-AM codes used in the identification of sleep apnea**

| <b>ICD-10-AM code</b> | <b>Description</b>                                                          | <b>Number of women (% of all cases in study)</b> |
|-----------------------|-----------------------------------------------------------------------------|--------------------------------------------------|
| G47.30                | Sleep apnoea, unspecified                                                   | 170 (32.8%)                                      |
| G47.31                | Central sleep apnoea syndrome<br>(Central sleep hypopnoea syndrome)         | 6 (1.2%)                                         |
| G47.32                | Obstructive sleep apnoea syndrome<br>(Obstructive sleep hypopnoea syndrome) | 336 (64.7%)                                      |
| G47.33                | Sleep hypoventilation syndrome                                              | 1 (0.2%)                                         |
| G47.39                | Other sleep apnoea                                                          | 6 (1.2%)                                         |
| <b>Total</b>          |                                                                             | <b>519 (100.0%)</b>                              |

Note: ICD-10-AM refers to the Australian Modification of the ICD-10. These codes differ from those in the ICD-10.

**Table S2. ICD-10-AM codes used in the identification of obesity**

| <b>ICD-10-AM code</b> | <b>Description</b>                                               | <b>Number of records (% of all records of obesity)</b> |
|-----------------------|------------------------------------------------------------------|--------------------------------------------------------|
| E65                   | Localised adiposity                                              | 156 (4.1%)                                             |
| E66.0                 | Obesity due to excess calories                                   | 12 (0.3%)                                              |
| E66.1                 | Drug-induced obesity                                             | 1 (0.0%)                                               |
| E66.2                 | Extreme obesity with alveolar hypoventilation                    | None                                                   |
| E66.8                 | Other obesity<br>(Morbid obesity)                                | 1,282 (33.4%)                                          |
| E66.9                 | Obesity, unspecified<br>(Simple obesity Not Otherwise Specified) | 2,388 (62.2%)                                          |
| <b>Total</b>          |                                                                  | <b>3,839 (100.0%)</b>                                  |

Note: There are 3 more obesity records than women with obesity (N = 3,836) because 2 women had both E65 and E66.9, and 1 woman had both E66.1 and E66.9.
